# Supplementary material for: Tools and methods for high-throughput single-cell imaging with the mother machine
Source: eLife journal article supplement (doi:10.7554/elife.88463), 2023-07-26
Supplement: figures [file elife-88463-figures-v1.pdf]

---

## Figures and figure supplements

Tools and methods for high-throughput single-cell imaging with the mother machine

**Ryan Thiermann, Michael Sandler and Gursharan Ahir *et al.***

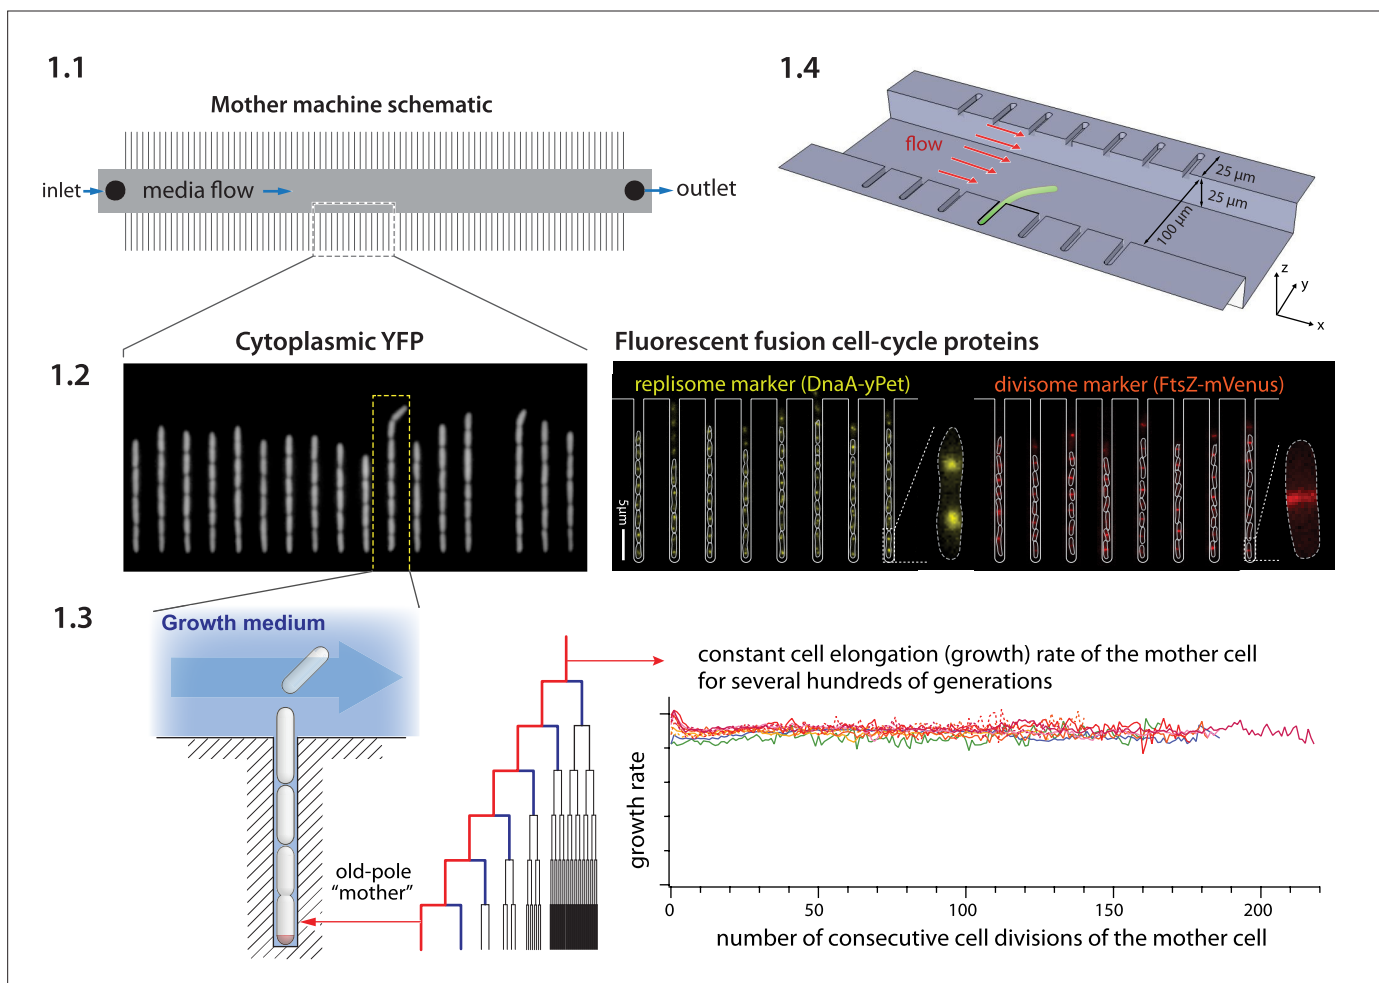

**Figure 1.** Mother machine workflow, schematic, and applications. **(1.1)** Mother machine schematic. Growth channels flank a central flow cell that supplies fresh media and whisks away daughter cells. In a typical experiment, numerous fields of view (FOVs) are imaged for several hours. **(1.2)** Fluorescence images of *E. coli* strains expressing cytoplasmic YFP (Wang et al., 2010) (left) and markers for the replisome protein DnaN and division protein FtsZ (right) (Si et al., 2019). **(1.3)** The mother machine setup allows long-term monitoring of the old-pole mother cell lineage (Wang et al., 2010) and has other versatile applications, including **(1.4)** the study of the mechanical properties of bacterial cells by applying controlled Stokes forces (Amir et al., 2014).

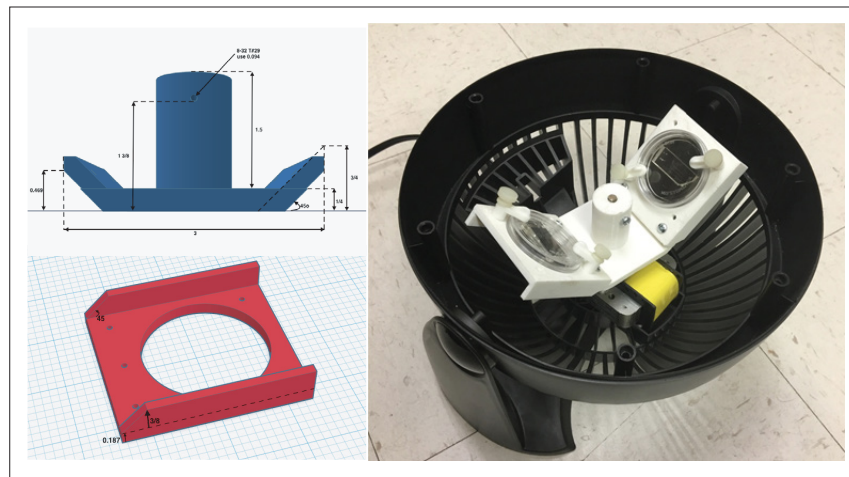

**Figure 1—figure supplement 1.** Inexpensive fabrication of cell loader with 3D printing. An inexpensive device for loading cells into the mother machine. The construction involves 3D printing a custom holder/rotor for a 50-mm WillCo dish, on which a mother machine is attached. The holder is printed in three parts (two blades and a central base) to account for 3D printers with small printing areas. This piece is then assembled and secured to a Honeywell fan from which the original blade has been removed. CAD files and details of the fan centrifuge construction are available at [Thiermann, 2023](#).

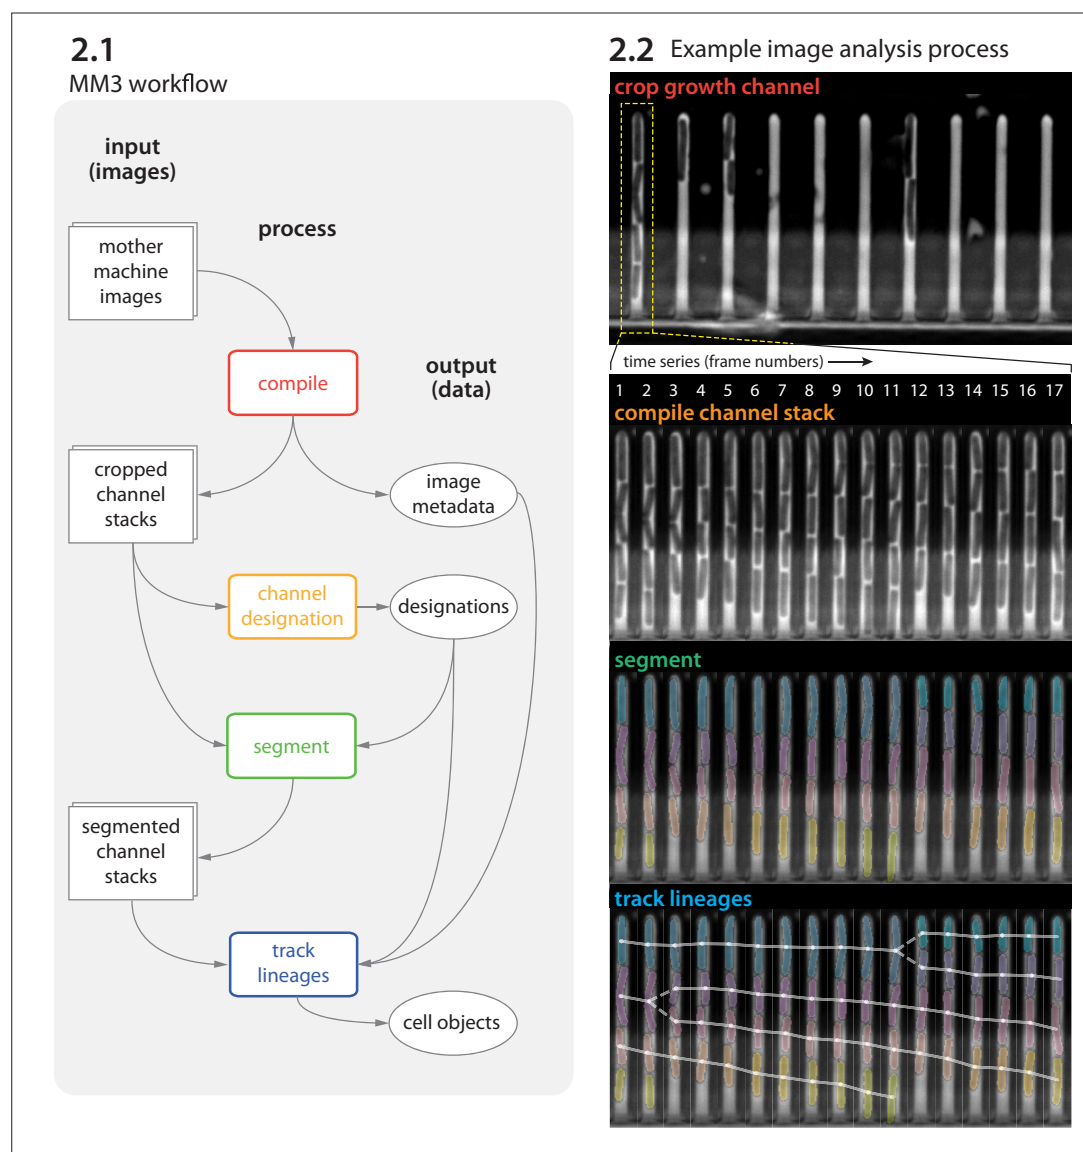

**Figure 2.** MM3 workflow and example images. **(2.1)** The MM3 image analysis pipeline takes raw mother machine images and produces cell objects. Processes (rounded rectangles) are modular; multiple methods are provided for each. **(2.2)** Example images from the processing of one growth channel in a single field of view (FOV). The growth channel is first identified, cropped, and compiled in time. All cells are segmented (colored regions). Lineages are tracked by linking segments in time to determine growth and division (solid and dashed lines, respectively), creating cell objects.

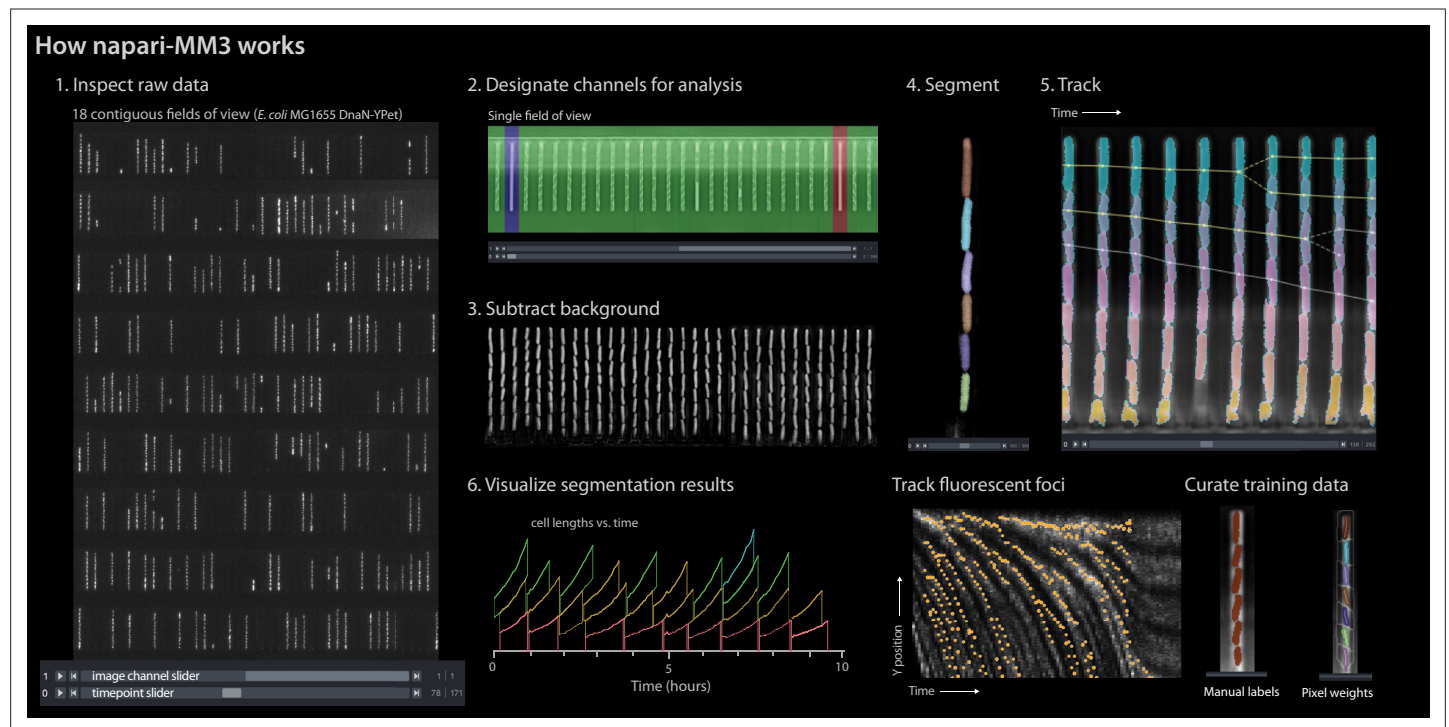

**Figure 3.** napari-MM3 interface. The napari viewer enables interactive analysis of mother machine data with real-time feedback and fast debugging. Raw data shown is from MG1655 background *E. coli* expressing the fluorescence protein YPet fused to the replisome protein DnaN (Si et al., 2019).

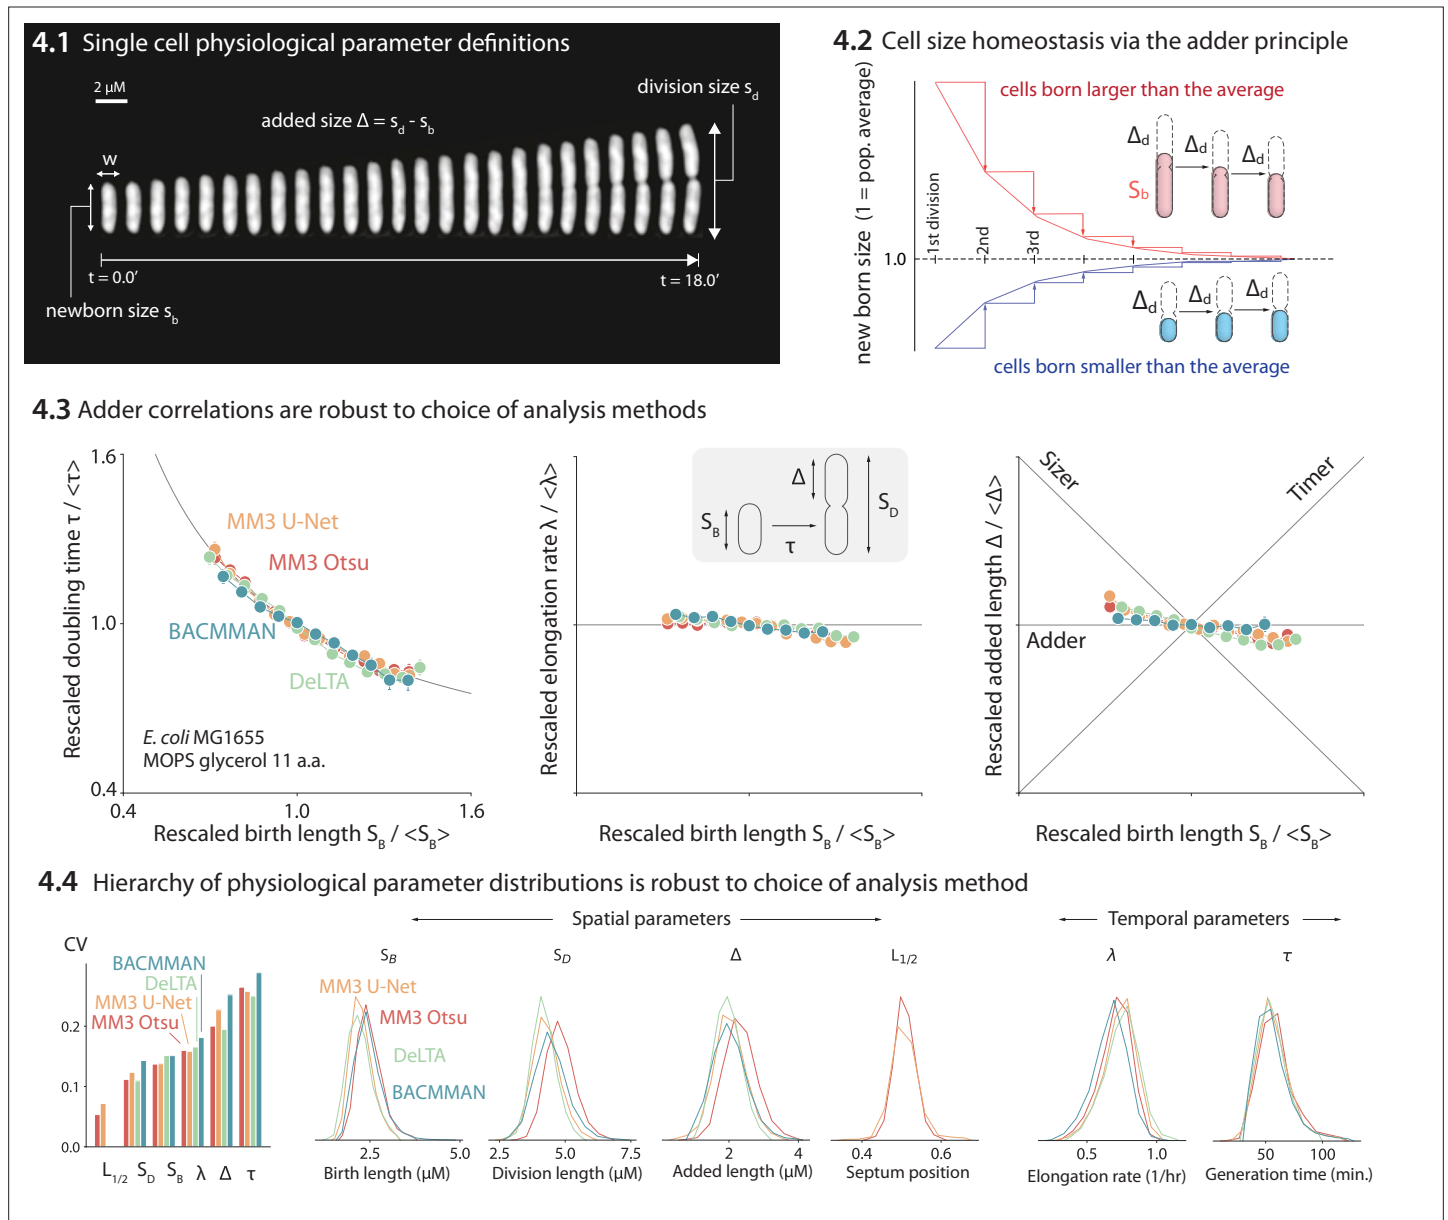

**Figure 4.** Comparison of various image analysis approaches. **(4.1)** A time series of a typical cell growing in a nutrient-rich medium. The birth size, division size, and added size are indicated. **(4.2)** The adder principle ensures cell size homeostasis via passive convergence of cell size to the population mean. **(4.3)** We analyzed multiple datasets from our lab using MM3, DeLTA, and BACMMAN, and obtained robust correlations between birth length, doubling time, elongation rate, and added length. Representative results from one dataset (Si et al., 2019) for MG1655 background *E. coli* grown in MOPS glycerol + 11 amino acids are shown, with 9000–13,000 cells analyzed depending on the method. Error bars indicate standard error of the mean (note the standard error is smaller than marker size in most cases). **(4.4)** Distributions of key physiological parameters are independent of the analysis methods. The data and code used to generate this figure are available at Thiermann, 2024a.

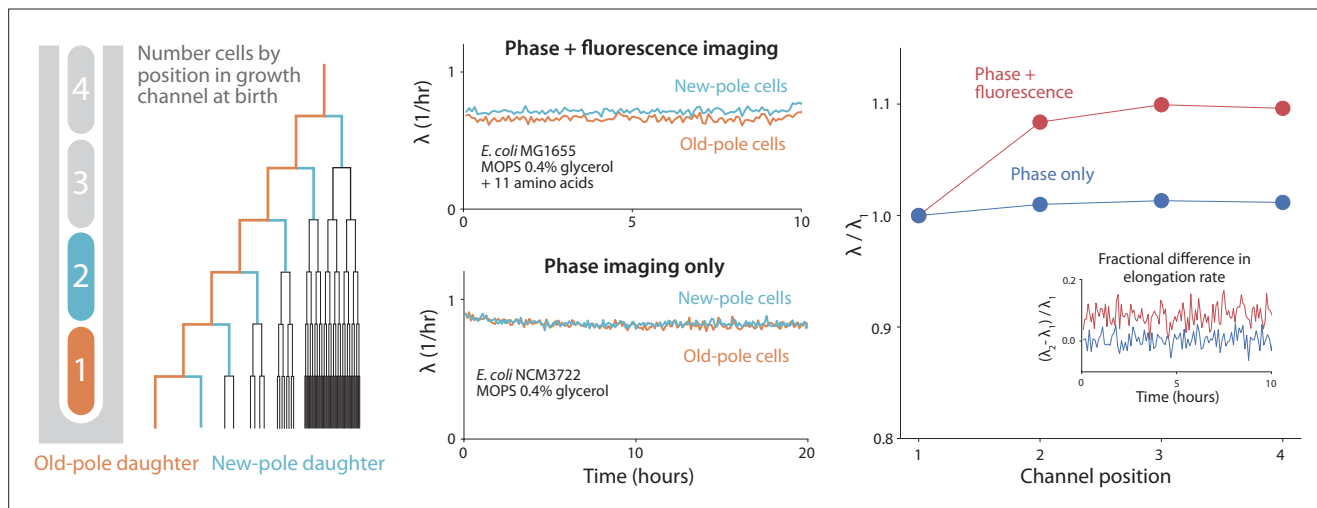

**Figure 4—figure supplement 1.** Old-pole aging phenotype is strain specific. Cells imaged with fluorescence often show signs of aging in the old-pole ‘mother’ cell. For instance, in the dataset analyzed in **Figure 4** (*E. coli* MG1655 with the fluorescent protein YPet fused to DnaN), we observed systematic differences in cell elongation rate and size between the old-pole cell at the end of the growth channel and its sisters, which inherit the new pole (top center). However, this asymmetry is not universal. Using napari-MM3’s Otsu segmentation method, we re-analyzed previously published data obtained without fluorescence illumination (**Taheri-Araghi et al., 2015a**), and found that the old- and new-pole cell elongation rates varied only on the order of 1% (lower center), while in the dataset obtained under fluorescence imaging, the old-pole mother cells grow 7–10% slower than the new-pole cells. Cells born third or fourth from the closed end of the channel also grow slower than the old-pole mother (right). The asymmetry in growth rate between old- and new-pole cells persists across time (right, inset). These results are consistent with a previous survey (**Rang et al., 2012**), which found that most evidence for aging in *E. coli* comes from studies utilizing fluorescent proteins for visualization.

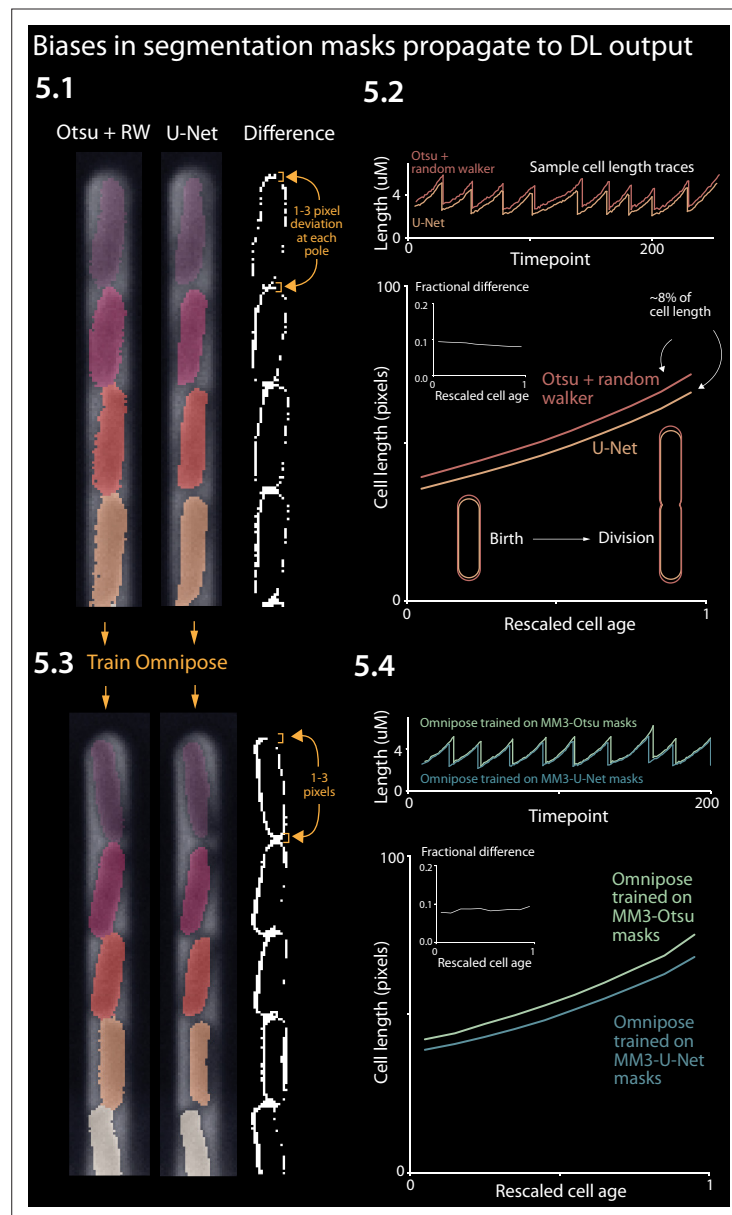

**Figure 5.** Effect of systematic deviation in segmentation output from different methods. **(5.1)** Otsu/random walker and U-Net segmentation masks. The classical method systematically yields masks that are 5–10% larger than the other methods. **(5.2)** We confirmed that this discrepancy occurs consistently across the cell cycle. **(5.3)** We trained the Omnipose model on masks generated by either napari-MM3-Otsu or napari-MM3-U-Net separately. **(5.4)** The systematic discrepancy in the training data masks propagated to the output of the trained models.



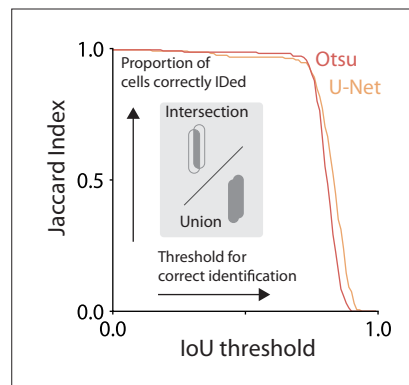

**Figure 5—figure supplement 1.** Evaluating segmentation output of napari-MM3 Otsu and U-Net methods. To evaluate the quality of the segmentation masks generated by MM3's Otsu and U-Net segmentation methods, we computed the Jaccard index (*Laine et al., 2021; Jeckel and Drescher, 2021*) as a function of the intersection-over-union (IoU) threshold.

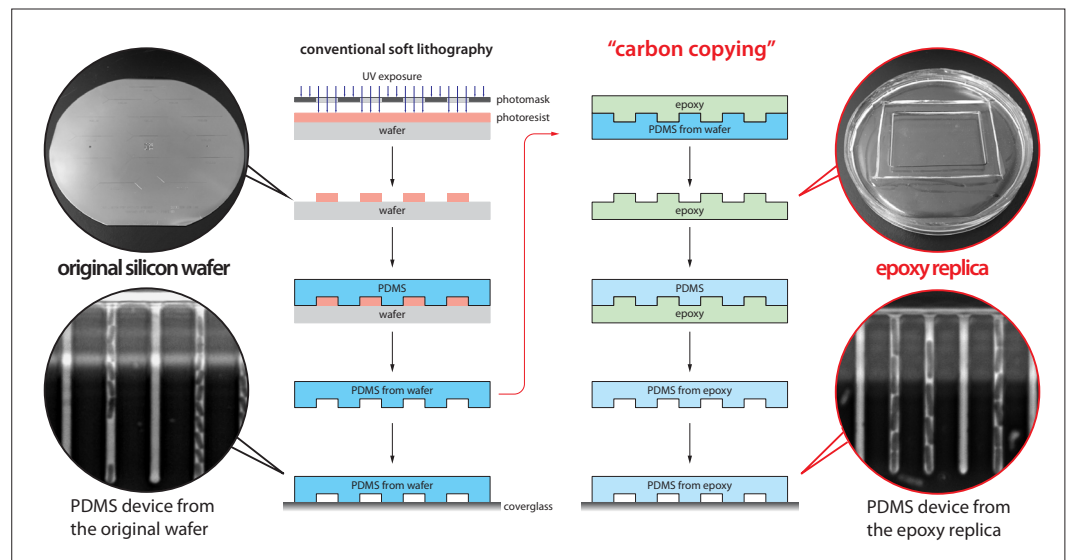

**Box 1—figure 1.** Duplication and distribution of mother machine devices with epoxy molds.

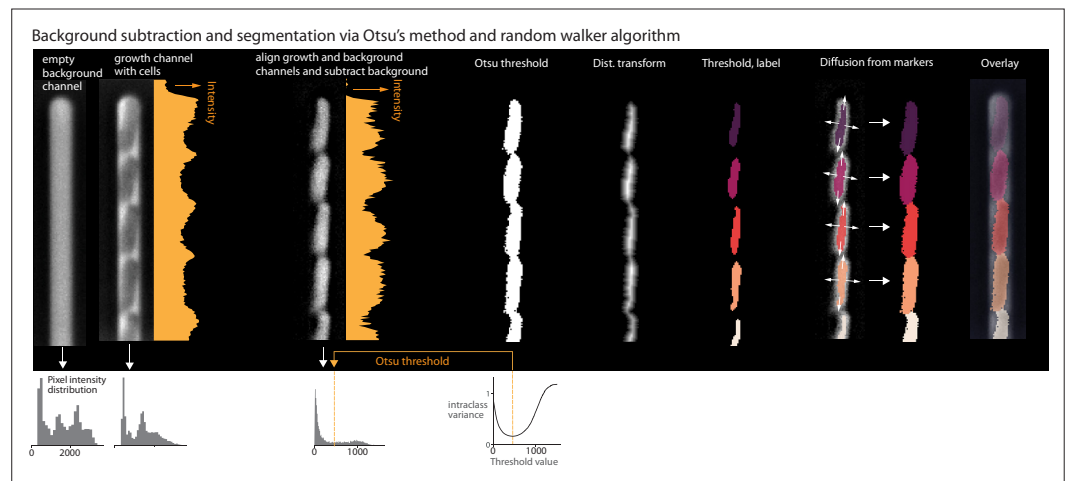

**Box 2—figure 1.** Background subtraction and segmentation via Otsu's method and random walker algorithm.
